# Supplementary material for: Phosphinecarboxamide as an unexpected phosphorus precursor in the chemical vapour deposition of zinc phosphide thin films
Source: Royal Society of Chemistry journal article supplement (doi:10.1039/c8dt00544c), 2018-01-01
Supplement: c8dt00544c1.pdf [file c8dt00544c1.pdf]

# **Phosphinecarboxamide as an unexpected phosphorus precursor for the chemical vapour deposition of zinc phosphide thin films**

Samuel V. F. Beddoe,<sup>1</sup> Samuel D. Cosham,<sup>1</sup> Alexander N. Kulak,<sup>2</sup> Andrew R. Jupp,<sup>3</sup> Jose M. Goicoechea<sup>3</sup> and Geoffrey Hyett<sup>1</sup>

<sup>1</sup> Department of Chemistry, University of Southampton, Southampton, SO17 1BJ, United Kingdom

<sup>2</sup> Department of Chemistry, University of Leeds, Leeds, LS2 9JT, UK

<sup>3</sup> Department of Chemistry, Chemistry Research Laboratory, University of Oxford, Mansfield Road, Oxford, OX1 3TA, UK

## **ABSTRACT:**

This paper demonstrates the use of phosphinecarboxamide (PCA) as a facile phosphorus precursor, which can be used alongside zinc acetate for the chemical vapour deposition (CVD) of adherent and crystalline zinc phosphide films. Zinc phosphide thin films have a number of potential applications and PCA has a number of advantages over the highly toxic, corrosive and flammable phosphine used in previous CVD syntheses.

## **SUPPORTING INFORMATION**

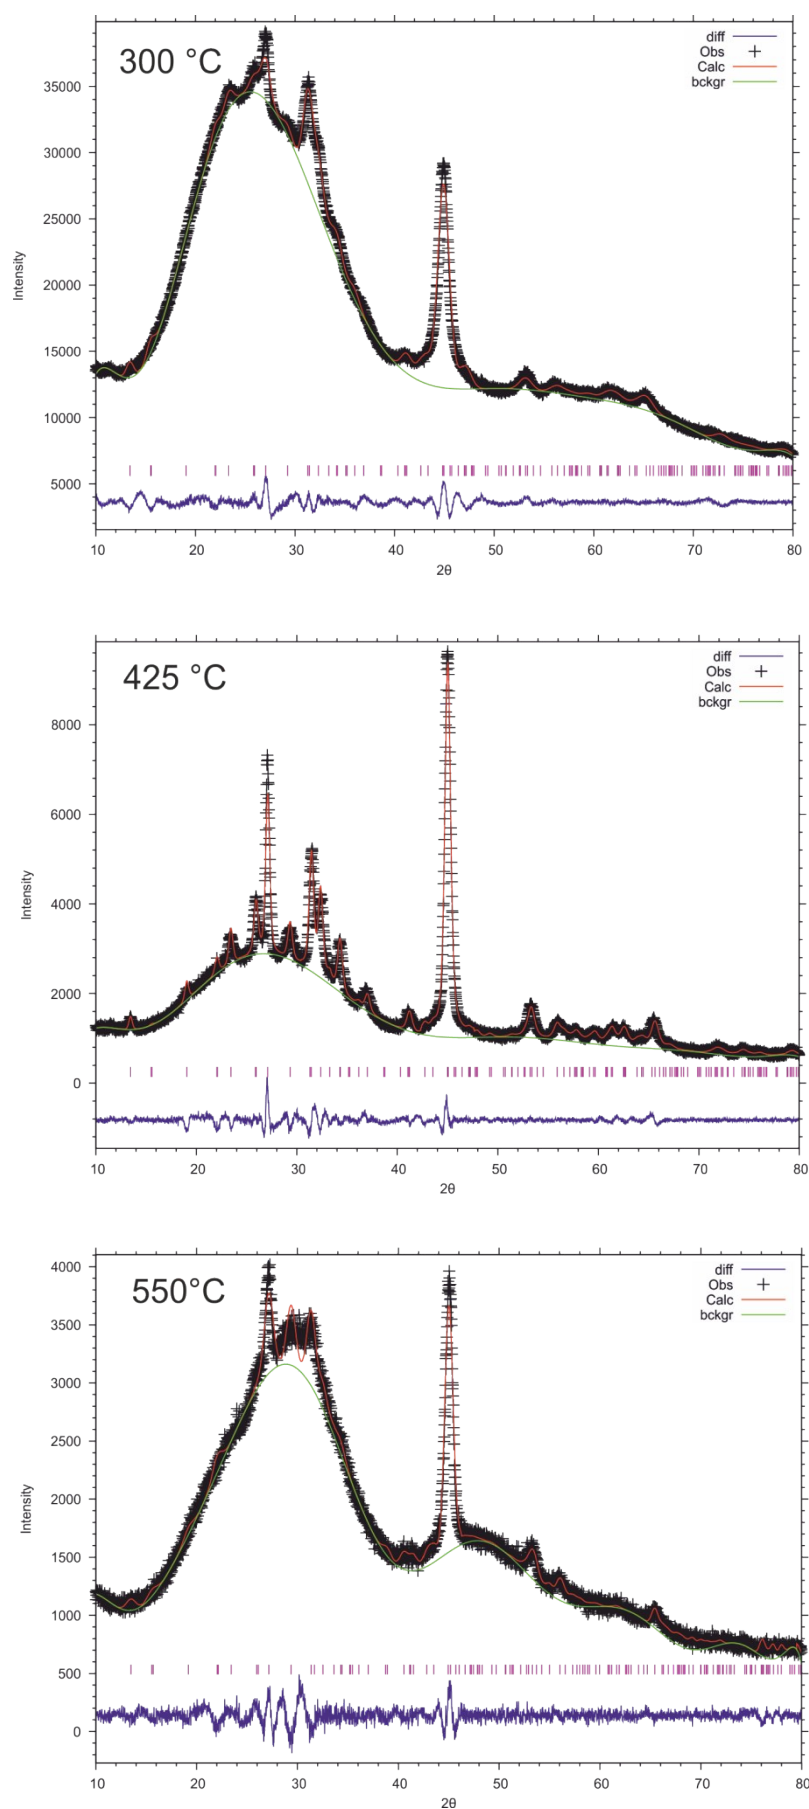

Figure S1. Rietveld refinement fits for the zinc phosphide ( $\text{Zn}_3\text{P}_2$ ) films deposited at different temperatures.

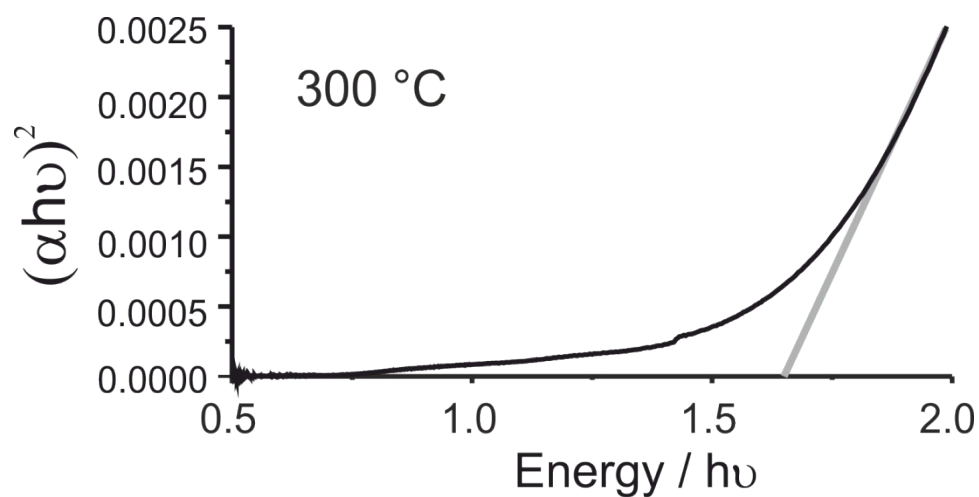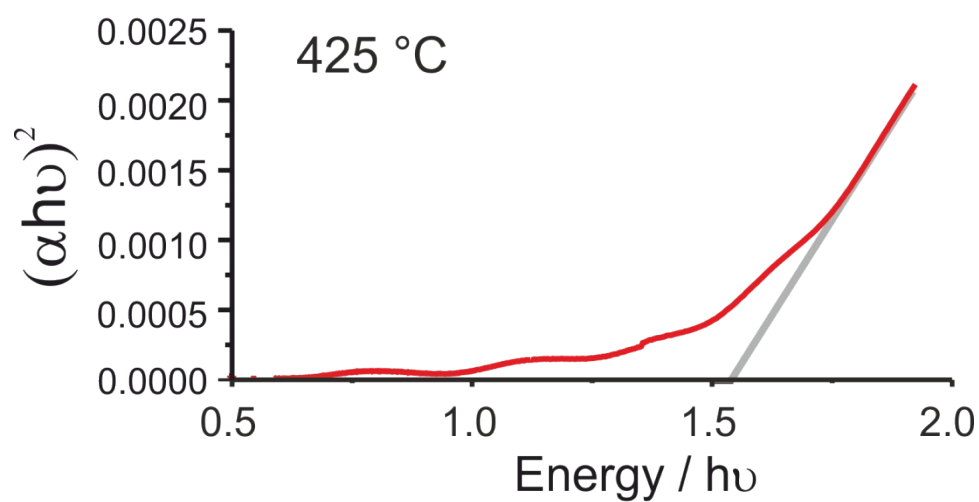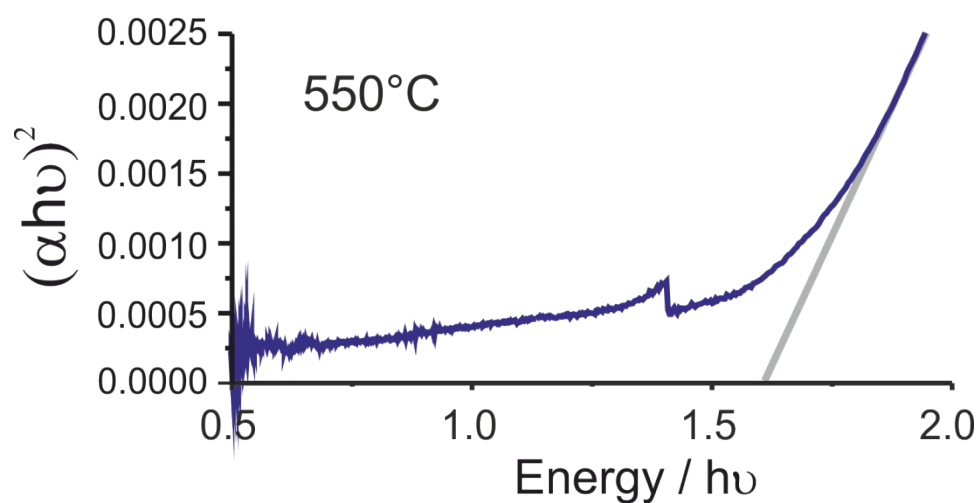

Figure S2. Tauc plots for Zn<sub>3</sub>P<sub>2</sub> films deposited at different temperatures.

300°C

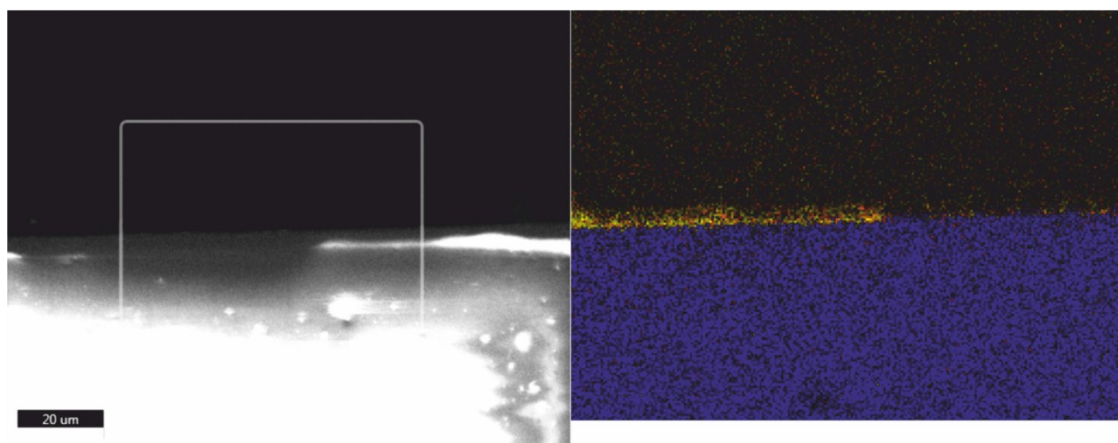

425°C

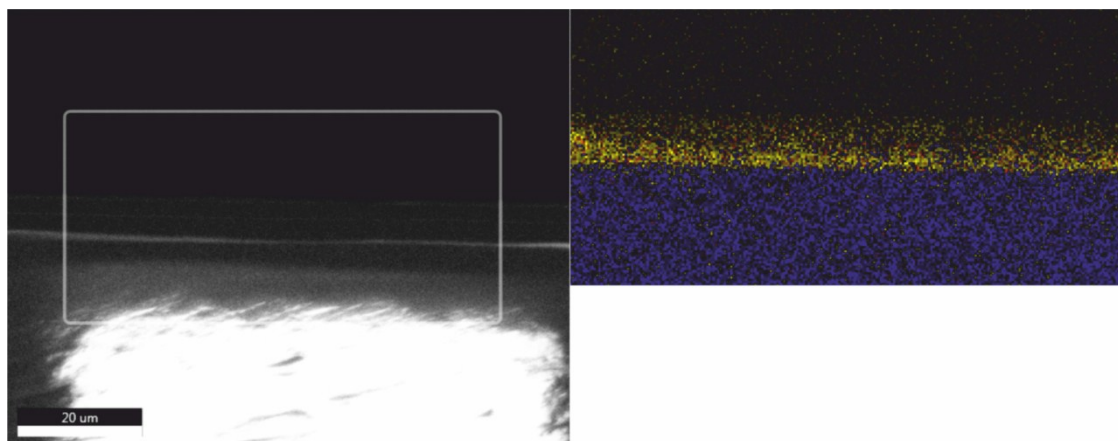

550°C

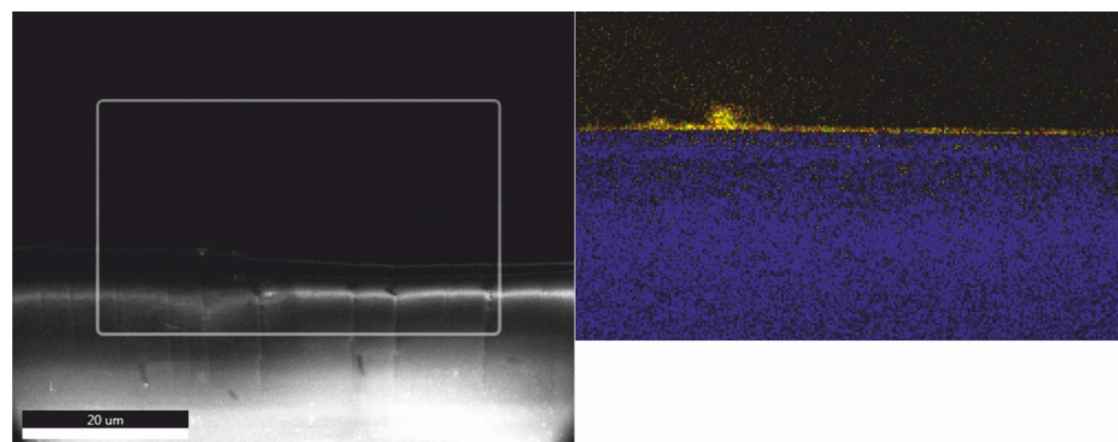

Figure S3. Side-on SEM images and EDX maps of the films deposited at different temperatures. The EDX maps show signals from oxygen K-lines as blue pixels, phosphorus K-lines as yellow pixels and zinc K-lines as red pixels.

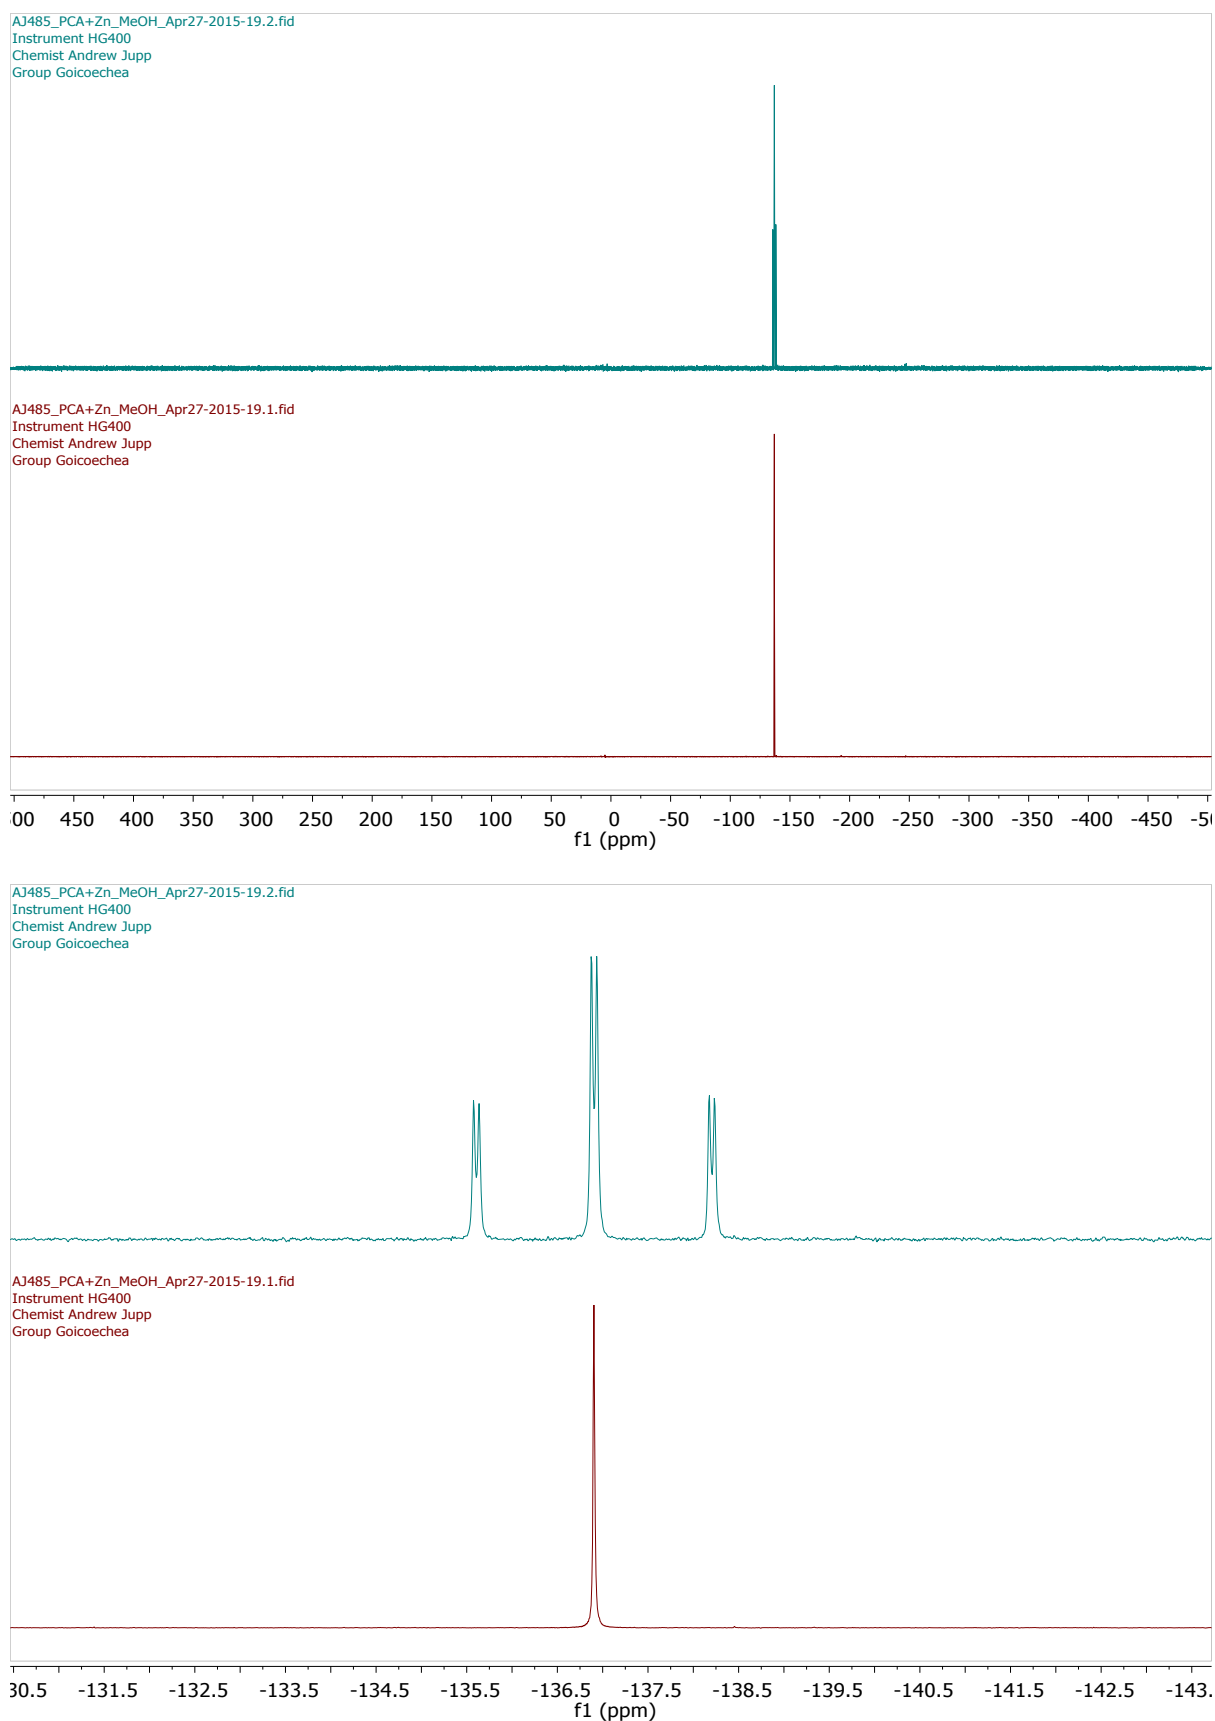

Figure S4. NMR data collected on zinc acetate (30 mmol) and phosphinecarboxamide (30 mmol) in methanol solution. Upper diagram shows large sweep width of  $^{31}\text{P}$  NMR (top, blue) and  $^{31}\text{P}\{^1\text{H}\}$  (bottom red). The lower figure shows the same spectra but scaled to show details of splitting patterns.
